# Supplementary material for: A Structure-Based Mechanism for DNA Entry into the Cohesin Ring
Source: PubMed Central journal article supplement (PMC7507959; doi:10.1016/j.molcel.2020.07.013), 2020-09-17

**Table S2. Image Processing Workflow for the Cryo-EM Core Structure, as well as Multibody Refinement Workflow that Led to the Identification of a Separate Rigid Body Identified as Psc3, Related to the STAR Methods**

**Cohesin Core Structure Image Processing Workflow**

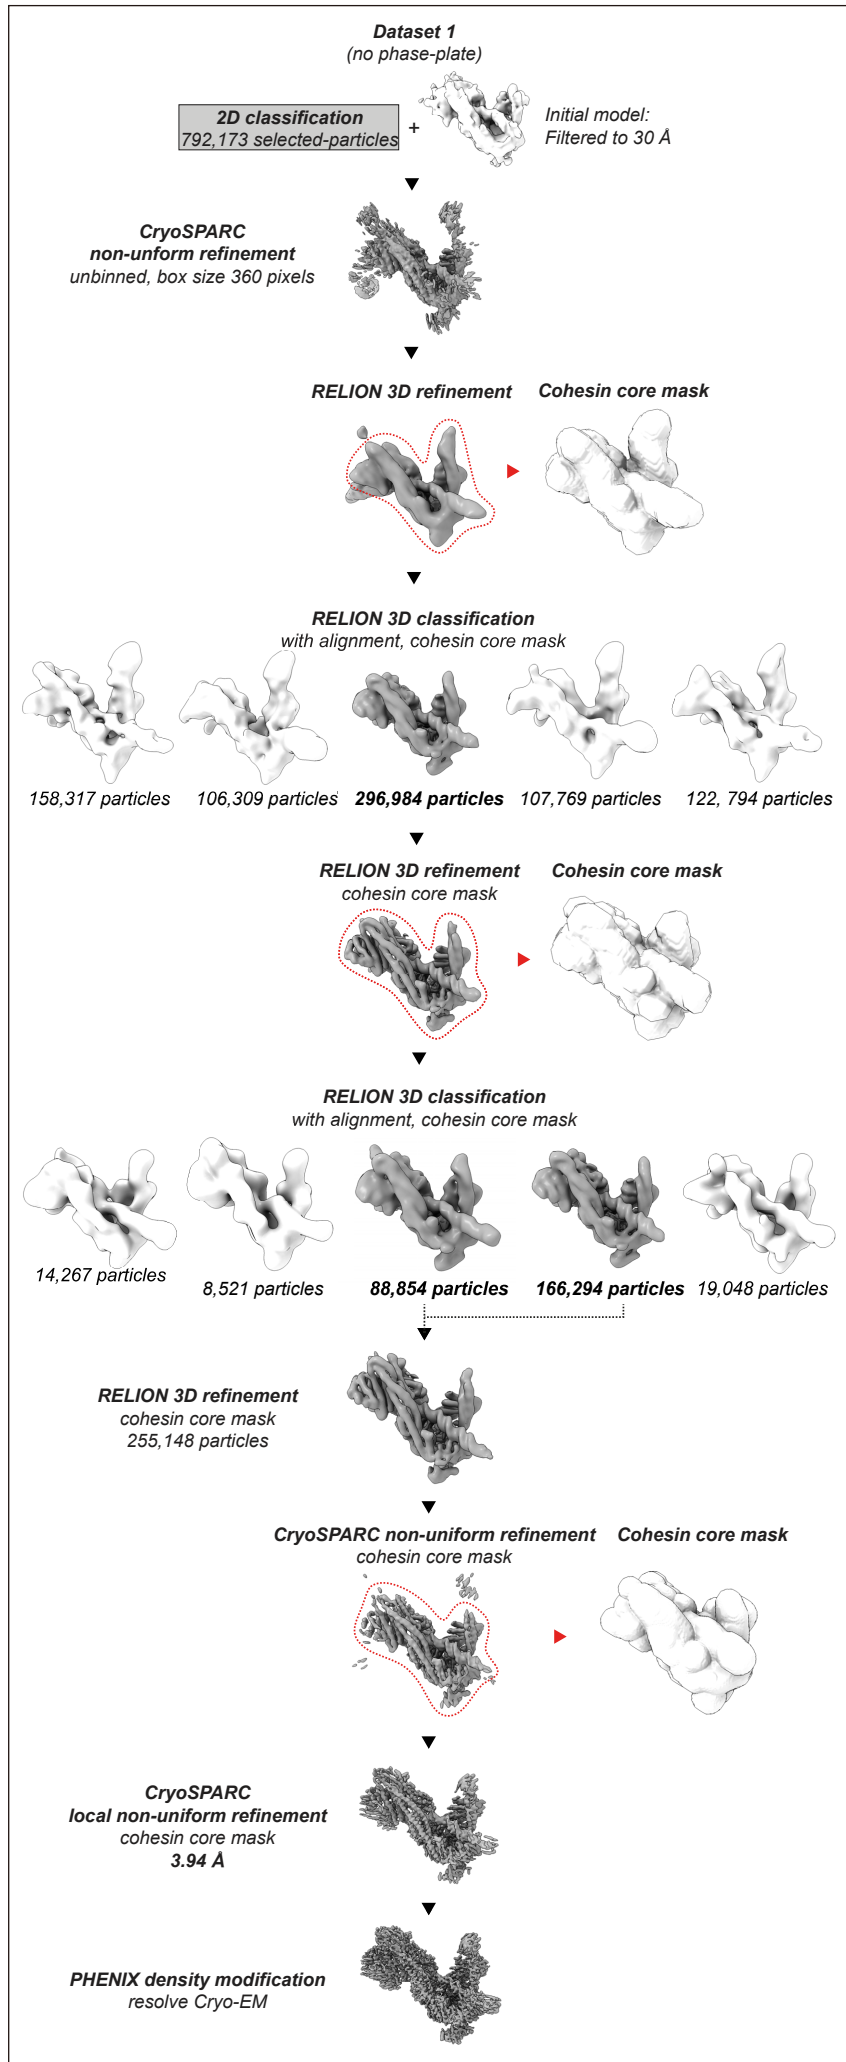

**Multibody Refinement Workflow**

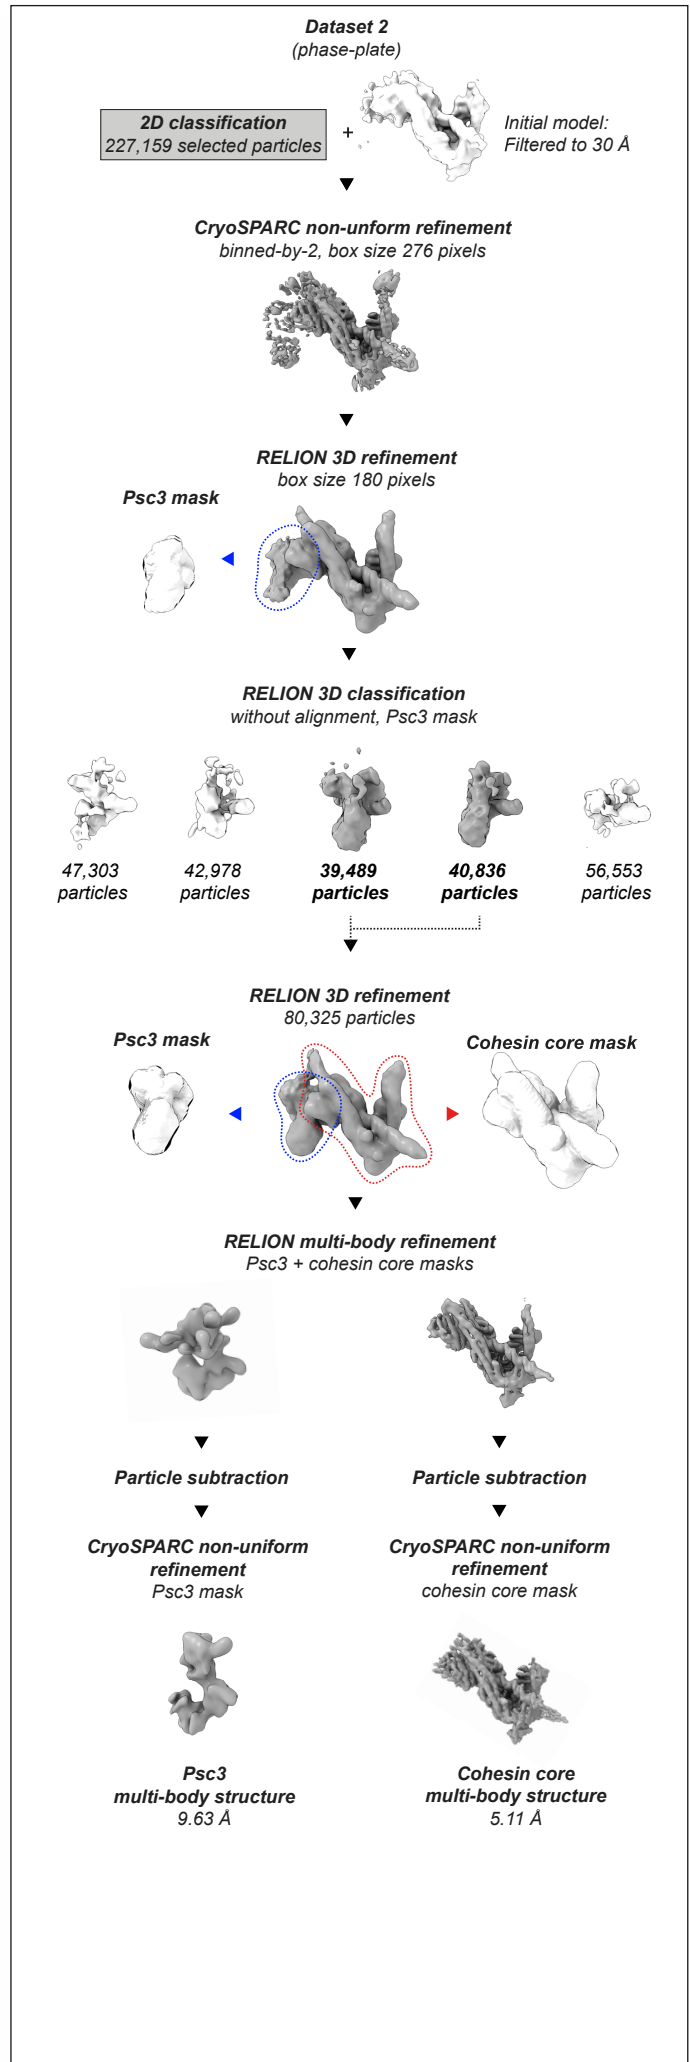

Supplement: mmc3.pdf [file mmc3.pdf]
